# Supplementary material for: Antigenic Characterization of Circulating and Emerging SARS-CoV-2 Variants in the U.S. throughout the Delta to Omicron Waves
Source: MDPI journal article supplement (doi:10.3390/vaccines12050505), 2024-05-07
Supplement: s1 [file s1]

**Supplementary Table S1. Vaccinee sera pools used in this study.**

|                                                                        | <b>Moderna post-primary series pool</b> | <b>Pfizer post-primary series pool</b> | <b>Medium range post-primary series pool</b> | <b>Medium range post 3<sup>rd</sup>-dose pool</b> |
|------------------------------------------------------------------------|-----------------------------------------|----------------------------------------|----------------------------------------------|---------------------------------------------------|
| <b>Number of serum samples</b>                                         | 10                                      | 10                                     | 5                                            | 5                                                 |
| <b>Age in years, median (range)</b>                                    | 23 (19-64)                              | 32.5 (21-54)                           | 49 (25-55)                                   | 52 (28-70)                                        |
| <b>Sex assigned at birth</b>                                           | Male (5)/Female (5)                     | Male (5)/Female (5)                    | Male (4)/Female (1)                          | Male (2)/Female (3)                               |
| <b>Days between sampling and last vaccination, median (range)</b>      | 32 (16-42)                              | 31 (16-39)                             | 28 (15-42)                                   | 34 (14-36)                                        |
| <b>Vaccine Type</b>                                                    | Moderna, monovalent                     | Pfizer-BioNTech, monovalent            | Moderna or Pfizer-BioNTech, monovalent       | Moderna or Pfizer-BioNTech, monovalent            |
| <b>Vaccine dose</b>                                                    | Two doses                               | Two doses                              | Two doses                                    | Three doses                                       |
| <b>Anti-SARS-CoV-2 Spike IgG <sup>1</sup> (BAU/mL), median (range)</b> | 2805 (605-8066)                         | 2398 (440-5227)                        | 2973 (1339-3541)                             | 2069 (159-3015)                                   |
| <b>Prior SARS-CoV-2 infection <sup>2</sup></b>                         | No                                      | No                                     | No                                           | No                                                |

<sup>1</sup> Anti-SARS-CoV-2 Spike IgG titers were determined against ancestral SARS-CoV-2.

<sup>2</sup> No prior SARS-CoV-2 infection was based on negative anti-nucleocapsid antibodies detected in the serum samples.

**Supplementary Table S2. Individual human sera collected from vaccine recipients who received 3 doses of the original mRNA monovalent vaccine.**

| Sample ID   | Age | Sex (assigned at birth) | Vaccine product | Date of 3 <sup>rd</sup> vaccination | Serum collection date | Prior COVID <sup>2</sup> | Anti-SARS-CoV-2 Spike IgG (BAU/mL) <sup>1</sup> |
|-------------|-----|-------------------------|-----------------|-------------------------------------|-----------------------|--------------------------|-------------------------------------------------|
| 3002086116* | 25  | Male                    | Moderna         | 11/5/2021                           | 12/6/2021             | No                       | 33                                              |
| 3002086117  | 33  | Female                  | Pfizer-BioNTech | 11/11/2021                          | 12/7/2021             | No                       | 63                                              |
| 3002086118  | 28  | Female                  | Moderna         | 11/5/2021                           | 12/10/2021            | No                       | 70                                              |
| 3002086119* | 35  | Female                  | Moderna         | 10/7/2021                           | 12/2/2021             | No                       | 20                                              |
| 3002086120* | 48  | Male                    | Moderna         | 11/5/2021                           | 12/6/2021             | No                       | 92                                              |
| 3002086122* | 65  | Male                    | Moderna         | 11/26/2021                          | 12/20/2021            | No                       | 22                                              |
| 3002086124* | 21  | Male                    | Pfizer-BioNTech | 11/16/2021                          | 12/7/2021             | No                       | 67                                              |
| 3002086126* | 52  | Female                  | Moderna         | 12/3/2021                           | 12/17/2021            | No                       | 159                                             |
| 3002086127* | 27  | Female                  | Moderna         | 11/18/2021                          | 12/6/2021             | No                       | 168                                             |
| 3002086135  | 28  | Female                  | Pfizer-BioNTech | 11/19/2021                          | 12/7/2021             | No                       | 92                                              |
| 3001241287* | 53  | Female                  | Pfizer-BioNTech | 10/8/2021                           | 11/2/2021             | No                       | 2069                                            |
| 3001241290  | 70  | Male                    | Pfizer-BioNTech | 9/29/2021                           | 11/4/2021             | No                       | 1563                                            |
| 3001241286* | 52  | Male                    | Pfizer-BioNTech | 9/28/2021                           | 10/26/2021            | No                       | 6247                                            |
| 3001241291  | 39  | Female                  | Pfizer-BioNTech | 9/29/2021                           | 11/4/2021             | No                       | 11641                                           |
| 3001241296  | 42  | Female                  | Moderna         | 11/2/2021                           | 12/1/2021             | No                       | 6961                                            |
| 3001241292  | 28  | Female                  | Pfizer-BioNTech | 10/19/2021                          | 11/22/2021            | No                       | 3015                                            |
| 3001241289* | 30  | Male                    | Pfizer-BioNTech | 9/30/2021                           | 11/4/2021             | No                       | 2314                                            |
| 3001241307* | 73  | Male                    | Pfizer-BioNTech | 10/29/2021                          | 11/22/2021            | No                       | 13457                                           |
| 3001241335* | 46  | Male                    | Pfizer-BioNTech | 11/4/2021                           | 12/2/2021             | No                       | 9277                                            |
| 3001241342* | 23  | Male                    | Moderna         | 11/5/2021                           | 11/22/2021            | No                       | 13978                                           |

<sup>1</sup> Anti-SARS-CoV-2 Spike IgG titers were determined against ancestral SARS-CoV-2.

<sup>2</sup> No prior COVID was based on negative anti-nucleocapsid antibodies detected in the serum samples.

\* 13 out of 20 sera were analyzed against the isolated Omicron variants BA.4/5.

**Supplementary Table S3. Individual human sera collected from vaccine recipients who received 3 doses of the original monovalent mRNA vaccine and 1 dose of the bivalent mRNA booster.**

| Sample ID  | Age | Sex (assigned at birth) | Vaccine product | Date of bivalent booster | Serum collection date | Prior COVID <sup>2</sup> | Anti-SARS-CoV-2 Spike IgG (BAU/mL) <sup>1</sup> |
|------------|-----|-------------------------|-----------------|--------------------------|-----------------------|--------------------------|-------------------------------------------------|
| 3032569196 | 48  | Male                    | Moderna         | 9/28/2022                | 10/14/2022            | No                       | 8983                                            |
| 3032569198 | 36  | Male                    | Pfizer-BioNTech | 10/12/2022               | 10/28/2022            | No                       | 6266                                            |
| 3032569201 | 25  | Male                    | Pfizer-BioNTech | 9/28/2022                | 11/8/2022             | No                       | 6403                                            |
| 3032569190 | 55  | Male                    | Pfizer-BioNTech | 9/27/2022                | 10/13/2022            | No                       | 6797                                            |
| 3032569184 | 39  | Female                  | Pfizer-BioNTech | 9/30/2022                | 11/10/2022            | No                       | 3086                                            |
| 3032569192 | 63  | Female                  | Moderna         | 9/28/2022                | 10/19/2022            | No                       | 8040                                            |
| 3032569188 | 48  | Female                  | Pfizer-BioNTech | 10/11/2022               | 10/26/2022            | No                       | 11840                                           |
| 3003753004 | 49  | Female                  | Moderna         | 11/8/2022                | 12/1/2022             | No                       | 13577                                           |
| 3003753064 | 61  | Female                  | Pfizer-BioNTech | 10/31/2022               | 11/17/2022            | No                       | 1775                                            |
| 3003753093 | 42  | Female                  | Pfizer-BioNTech | 11/9/2022                | 11/30/2022            | No                       | 3298                                            |
| 3003753048 | 47  | Male                    | Moderna         | 11/23/2022               | 12/5/2022             | No                       | 6078                                            |

<sup>1</sup> Anti-SARS-CoV-2 Spike IgG titers were determined against ancestral SARS-CoV-2.

<sup>2</sup> No prior COVID was based on negative anti-nucleocapsid antibodies detected in the serum samples.
